# Supplementary material for: Targeted Gene Next-Generation Sequencing Panel in Patients with Advanced Lung Adenocarcinoma: Paving the Way for Clinical Implementation
Source: PubMed Central journal article supplement (PMC6770536; doi:10.3390/cancers11091229), 2019-08-22
Supplement: cancers-11-01229-s001.pdf [file cancers-11-01229-s001.pdf]

# Supplementary Materials: Targeted Gene Next-Generation Sequencing Panel in Patients with Advanced Lung Adenocarcinoma: Paving the Way for Clinical Implementation

Table S1. EGFR mutations assessed by Sanger.

| EGFR Mutation Annotation Exon | Genomic                              | Protein                | Number of Patients |
|-------------------------------|--------------------------------------|------------------------|--------------------|
| Exon 19                       | c.2235_2249del15                     | p.E746_A750delELREA    | 8                  |
|                               | c.2236_2250del15                     | p.E746_A750delELREA    | 2                  |
|                               | c.2239_2248TTAAGAGAAG > C            | p.L747_A750 > P        | 1                  |
|                               | c.2237_2251del15                     | p.E746_T751 > A        | 1                  |
|                               | c.2239_2261del22ins                  | p.L747_K754delLREATSPK | 1                  |
|                               | c.2240_2254del15                     | p.L747_T751delLREAT    | 1                  |
|                               | c.2240_2254del15                     | p.L747_T751delLREAT    | 1                  |
|                               | c.2240_2257del18                     | p.L747_P753 > S        | 2                  |
| Exon 20                       | c.2248_2276 > CCAAC                  | p.A750_I759 > PT       | 1                  |
|                               | c.2300_2308dupl<br>p.D770_N771insSVD |                        | 1                  |
| Exon 21                       | c.2310_2311insG                      | p.D770_N771insG        | 1                  |
| Exon 21                       | c.2573T > G                          | p.Leu785Arg            | 5                  |
| Total                         |                                      |                        | 22                 |

Table S2. NGS Mutation Annotation and Allelic Frequency of the Experimental cohort.

| Mutation                     | Aminoacid           | Clinical Significance | Allelic Frequency |
|------------------------------|---------------------|-----------------------|-------------------|
| KRAS                         |                     |                       |                   |
| KRAS c.182A > G              | p.Gln61Arg          | Pathogenic            | 8.8               |
| KRAS c.35G > A               | p.Gly12Asp          | Pathogenic            | 6.1               |
| KRAS c.35G > T               | p.Gly12Val          | Pathogenic            | 11.7              |
| KRAS c.35G > T               | p.Gly12Val          | Pathogenic            | 27.4              |
| KRAS c.34G > T               | p.Gly12Cys          | Pathogenic            | 3.8               |
| KRAS c.35G > T               | p.Gly12Val          | Pathogenic            | 6.5               |
| KRAS c.35G > T               | p.Gly12Val          | Pathogenic            | 19.9              |
| KRAS c.35G > T               | p.Gly12Val          | Pathogenic            | 3.3               |
| KRAS c.34G > T               | p.Gly12Cys          | Pathogenic            | 15                |
| KRAS c.38_39delGCinsAA       | p.Gly13Glu          | Likely pathogenic     | 14.2              |
| KRAS c.34G > T               | p.Gly12Cys          | Pathogenic            | 5.9               |
| KRAS c.35G > T               | p.Gly12Val          | Pathogenic            | 20.4              |
| KRAS c.35G > T               | p.Gly12Val          | Pathogenic            | 44.7              |
| KRAS c.34G > T               | p.Gly12Cys          | Pathogenic            | 5.9               |
| KRAS c.35G > T               | p.Gly12Val          | Pathogenic            | 55.2              |
| KRAS c.34G > T               | p.Gly12Cys          | Pathogenic            | 17.4              |
| KRAS c.35G > T               | p.Gly12Val          | Pathogenic            | 50.6              |
| KRAS c.35G > A               | p.Gly12Asp          | Pathogenic            | 22.3              |
| KRAS c.34G > T               | p.Gly12Cys          | Pathogenic            | 72.5              |
| KRAS c.35G > T               | p.Gly12Val          | Pathogenic            | 26.7              |
| KRAS c.35G > T               | p.Gly12Val          | Pathogenic            | 46.3              |
| KRAS c.182A > G              | p.Gln61Arg          | Pathogenic            | 0.38              |
| KRAS c.35G > T               | p.Gly12Val          | Pathogenic            | 28.6              |
| EGFR                         |                     |                       |                   |
| EGFR c.2240_2257del18        | p.L747_P753 > S     | Pathogenic            | 40.0              |
| EGFR c.2238_2252del15        | p.L747_T751delLREAT | Pathogenic            | 27.8              |
| EGFR c.2296_2297insTGGCCAGCG | p.V769_D770insASV   | Pathogenic            | 50.9              |
| EGFR c.2235_2249del15        | p.E746_A750delELREA | Pathogenic            | 74.1              |
| EGFR c.2235_2249del15        | p.E746_A750delELREA | Pathogenic            | 56.5              |
| EGFR c.2248_2276 > CCAAC     | p.A750_I759 > PT    | Pathogenic            | 84.5              |
| EGFR c.2573T > G             | p.Leu785Arg         | Pathogenic            | 29.2              |
| EGFR c.2235_2249del15        | p.E746_A750delELREA | Pathogenic            | 7.6               |
| EGFR c.2236_2250del15        | p.E746_A750delELREA | Pathogenic            | 11.1              |
| EGFR c.2573T > G             | p.Leu785Arg         | Pathogenic            | 18.6              |

|                                |                       |                   |      |
|--------------------------------|-----------------------|-------------------|------|
| EGFR c.2236_2250del15          | p.E746_A750delELREA   | Pathogenic        | 36.7 |
| EGFR c.2573T > G               | p.Leu785Arg           | Pathogenic        | 31.3 |
| EGFR c.2240_2254del15          | p.L747_T751delLREAT   | Pathogenic        | 96.5 |
| EGFR c.2239_2248TTAAGAGAAG > C | p.L747_A750 > P       | Pathogenic        | 66.0 |
| EGFR c.2240_2257del18          | p.L747_P753 > S       | Pathogenic        | 67.2 |
| EGFR c.2235_2249del15          | p.E746_A750delELREA   | Pathogenic        | 20.4 |
| EGFR c.2235_2249del15          | p.E746_A750delELREA   | Pathogenic        | 13.2 |
| EGFR c.2239_2248TTAAGAGAAG > C | p.L747_A750 > P       | Pathogenic        | 14.0 |
| EGFR c.2573T > G               | p.Leu785Arg           | Pathogenic        | 6.3  |
| EGFR c.2573T > G               | p.Leu785Arg           | Pathogenic        | 15.3 |
| EGFR c.2369C > T               | p.Thr790Met           | Pathogenic        | 0.6  |
| EGFR c.2235_2249del15          | p.E746_A750delELREA   | Pathogenic        | 34.6 |
| EGFR c.2235_2249del15          | p.E746_A750delELREA   | Pathogenic        | 35.8 |
| EGFR c.2235_2249del15          | p.E746_A750delELREA   | Pathogenic        | 31.7 |
| EGFR c.2236_2250del15          | p.E746_A750delELREA   | Pathogenic        | 0.17 |
| BRAF                           |                       |                   |      |
| BRAF c.1799T > A               | p.Val600Glu           | Pathogenic        | 36.3 |
| BRAF c.1799T > A               | p.Val600Glu           | Pathogenic        | 50.4 |
| BRAF c.1799T > A               | p.Val600Glu           | Pathogenic        | 29.1 |
| BRAF c.1799T > A               | p.Val600Glu           | Pathogenic        | 10.9 |
| BRAF c.1799T > A               | p.Val600Glu           | Pathogenic        | 11.2 |
| TP53                           |                       |                   |      |
| TP53 c.524G > A                | p.Arg175His           | Pathogenic        | 2.13 |
| TP53 c.538G > T                | p.Glu180Lys           | Likely pathogenic | 37.8 |
| TP53 c.839G > A                | p.Arg280Lys           | Likely pathogenic | 13.0 |
| TP53 c.476C > T                | p.Ala159Val           | Uncertain         | 39.2 |
| TP53 c.461G > T                | p.Gly154Val           | Uncertain         | 24.7 |
| TP53 c.1024C > T               | p.Arg342Ter           | Pathogenic        | 21.0 |
| TP53 c.493C > T                | p.Gln165Ter           | Pathogenic        | 14.8 |
| PIK3CA                         |                       |                   |      |
| PIK3CA c.1633G > A             | p.Glu545Gln           | Pathogenic        | 27.8 |
| HERBB2                         |                       |                   |      |
| HER2 c.2310_2311insGCATAC      | p.Ala775_Gly776insTyr | Pathogenic        | 20.0 |
| HERBB4                         |                       |                   |      |
| HERBB4 c.1033G > T             | Not Found             | Unknown           | 14.9 |
| ALK                            |                       |                   |      |
| ALK                            | c.3512T > A           | Pathogenic        | 0.08 |
| STK11                          |                       |                   |      |
| STK11                          | p.Gln37ter            | Pathogenic        |      |
| STK11                          | p.Glu199Asp           | Pathogenic        | 12.8 |

Table S3. NGS Mutation Annotation of the Clinical Implementation Cohort.

| Mutation   | Aminoacid  | Allelic Frequency |
|------------|------------|-------------------|
| KRAS       |            |                   |
| c.34G > T  | p.Gly12Val | 28                |
| c.35G > A  | p.Gly12Asp | 16                |
| c.179G > A | p.Gly60Asp | 11                |
| c.34G > T  | p.Gly12Cys | 10                |
| c.35G > T  | p.Gly12Val | 3                 |
| c.37G > T  | p.Gly12Cys | 23                |
| c.38G > A  | p.Gly13Asp | 86                |
| c.35G > C  | p.Gly12Ala | 28                |
| c.34G > T  | p.Gly12Cys | 25                |
| c.34G > T  | p.Gly12Cys | 9                 |
| c.34G > T  | p.Gly12Cys | 32                |
| c.35G > T  | p.Gly12Val | 21                |
| c.35G > C  | p.Gly12Val | 24                |
| c.35G > A  | p.Gly12Asp | 6                 |
| c.182A > G | p.Gln61Arg | 26                |
| c.34G > T  | p.Gly12Cys | 44                |
| c.35G > T  | p.Gly12Val | 8                 |
| c.183A > C | p.Gln61His | 29                |
| c.35G > A  | p.Gly12Asp | 31                |
| c.37G > T  | p.Gly13Cys | 72                |
| c.34G > T  | p.Gly12Cys | 21                |
| c.35G > A  | p.Gly12Asp | 19                |
| c.35G > C  | p.Gly12Val | 16                |
| c.35G > C  | p.Gly12Ala | 29                |
| c.34G > T  | p.Gly12Cys | 25                |
| c.35G > A  | p.Gly12Asp | 6                 |
| c.34G > T  | p.Gly12Cys | 23                |
| c.35G > C  | p.Gly12Asp | 36                |
| c.34G > T  | p.Gly12Cys | 48                |
| c.34G > T  | p.Gly12Cys | 66                |
| c.34G > T  | p.Gly12Cys | 18                |

|                     |                                |      |
|---------------------|--------------------------------|------|
| c.35G > A           | p.Gly12Asp                     | 20.3 |
| c.35G > T           | p.Gly12Val                     | 158  |
| EGFR                |                                |      |
| c.2573T > G         | p.Leu858Arg                    | 50   |
| c.2235_2249del      | p.E746_A750delELREA            |      |
| c.2300_2308dup9     | p.Ala767_Val769dup             | 52.4 |
| c.2237_2255delInsT  | p.Glu746_Ser752delInsVal       | 22   |
| c.2237_2255delInsT  | p.Glu746_Ser752delInsVal       | 48   |
| c.2314_2319dup      | p.Pro772_His773dup             | 55   |
| c.2573T > G         | p.Leu858Arg                    | 22   |
| c.2235_2249del      | p.Glu746_Ala750delInsGlnPro    | 6    |
| c.2310_2311ins3     | p.Asp770_Asn771insTyr          | 25   |
| c.2235_2249del      | p.Glu746_Ala750delInsGlnPro    | 54   |
| c.2237_2248delInsC  | p.Glu746_Ala750delInsGlnPro    | 25   |
| c.2235_2249del      | p.Glu746_Ala750del             | 33   |
| c.240_2254del       | p.leu747_Thr751delInsPro       | 48   |
| c.2239_2250         | p.leu747_Thr751delInsPro       | 38   |
| c.2235_2249del      | p.Glu746_Ala750delInsGlnPro    | 38   |
| c.2303G > T         | p.Ser768Ile                    | 12   |
| c.2573T > G         | p.Leu858Arg                    | 29   |
| c.2573T > G         | p.Leu858Arg                    | 41   |
| ALK_rearrangments   |                                |      |
|                     | EML4(2)-ALK(20)                |      |
|                     | EML4(13)-ALK(20)               |      |
|                     | EML4(6)-ALK(20)                |      |
|                     | EML4(13)-ALK(20)               |      |
|                     | EML4(13)-ALK(20)               |      |
|                     | EML4(13)-ALK(20)               |      |
|                     | EML4(13)-ALK(20)               |      |
|                     | EML4(13)-ALK(20)               |      |
|                     | EML4-ALK                       |      |
| HERBB2              |                                |      |
| c.2593G > A         | p.Gly865Arg                    | 3.4  |
| c.2521c > G         | p.Leu841Val                    | 15   |
| c.2324_2325InsATACG | p.Glu770_Ala771InsAlaTryValMet | 13   |
| c.2324_2325InsATAC  | p.Glu770_Ala771InsAlaTryValMet | 89   |
| c.2263_2264delTTin  | p.Leu755Pro                    | 20   |
| BRAF                |                                |      |
| c.1801A > G         | p.Lys601Glu                    | 15   |
| c.1780G > A         | p.Asp594Asn                    | 17   |
| c.1801A > G         | p.Lys601Glu                    | 8    |
| c.1742A > T         | p.Asn581Ile                    | 12   |
| RET_rearrangments   |                                |      |
|                     | KIF5B(15)-RET(12)              |      |
|                     | KIF5B(24)-RET(11)              |      |
|                     | KIF5B(15)-RET(12)              |      |
|                     | KIF5B(15)-RET(12)              |      |
| MET                 |                                |      |
| Exon 14 skipping    |                                |      |
| Exon 14 skipping    |                                |      |
| Exon 14 skipping    |                                |      |
| ALK                 |                                |      |
| c.3651G > T         | p.Gln1217His                   | 27   |
| PIK3CA              |                                |      |
| c.2176G > A         | p.Glu726Lys                    | 5    |
| Others              |                                |      |
| NTRK1_rearrangments | TPM3-NTRK                      |      |
| ROS1_rearrangments  | CD74(6)-ROS1(34)               |      |

**Table 4.** NGS co-alterations in the clinical implementation cohort.

| Case ID | Gene   | Mutation Annotation | AF   | Clinical Significance                        |
|---------|--------|---------------------|------|----------------------------------------------|
| 83      | KRAS   | c.34G > T           | 66   | Pathogenic                                   |
|         | ALK    | c.4812C > A         |      | Uncertain significance                       |
| 89      | EGFR   | c.2235_2249del      | 38   | Pathogenic                                   |
|         | PIK3CA | c.1633G > A         | 20   | Pathogenic                                   |
| 9       |        | KIF5B(15)-RET(12)   |      | Pathogenic                                   |
|         | HER2   | c.2333G > T         | 5    | Unknown                                      |
| 10      | KRAS   | c.34G > T           | 18   | Pathogenic                                   |
|         | HER2   | c.2593G > A         | 4    | Unknown                                      |
| 59      | EGFR   | c.2303G > T         | 12   | Pathogenic                                   |
|         | KRAS   | c.35G > T           | 22   | Pathogenic                                   |
| 112     |        | EML4(13)-ALK(20)    |      | Pathogenic                                   |
|         | MET    | c.3335A > T         | 4    | Unknown                                      |
|         |        | Exon14 skipping     |      | Pathogenic                                   |
| 26      | KRAS   | c.35G > A           | 20.3 | Pathogenic                                   |
|         | MET    | c.3029C > T         | 44   | Conflicting interpretations of pathogenicity |
| 31      | KRAS   | c.35G > T           | 158  | Pathogenic                                   |
|         | MET    | c.504G > T          | 50   | Likely benign                                |
| 28      | EGFR   | c.2573T > G         | 29   | Pathogenic                                   |
|         | PI3KCA | c.3140A > G         | 34   | Pathogenic                                   |
| 11      | EGFR   | c.2573T > G         | 41   | Pathogenic                                   |
|         | PIK3CA | c.1638G > C         | 19   | Pathogenic                                   |
| 109     | BRAF   | c.1742A > T         | 12   | Pathogenic                                   |
|         | PIK3CA | c.2164G > A         | 7    | Pathogenic                                   |

## Supplementary Methods

### Methods S1. Sanger Sequencing

The PCR amplifications of exons 18, 19, 20 and 21 of EGFR gene were performed. The amplified products were enzymatically purified using FastAP Thermosensitive Alkaline Phosphatase and Exonuclease I (Fermentas, Waltham, MA, USA), sequenced with BigDye Terminator v3.1 Cycle Sequencing Kit (Applied Biosystems, Waltham, MA, USA) and run on the ABI PRISM 3130xl Genetic Analyzer (Applied Biosystems) according to manufacturer's instructions. Variant analysis was carried out with the software Mutation Surveyor 3.24 (Softgenetics LLC, State College, PA, USA).

### Methods S2. Fluorescence *in situ* Hybridisation (FISH)

ALK fusions were detected using the Vysis ALK break-apart FISH probe kit following manufacturer instructions (Abbott Molecular, Abbott Park, IL, USA). Only patients that tested negatively for EGFR were tested for ALK fusions.

### Abbreviations

| AKT1   | AKT serine/threonine kinase 1                                          |
|--------|------------------------------------------------------------------------|
| ALK    | ALK receptor tyrosine kinase                                           |
| BRAF   | B-Raf proto-oncogene, serine/threonine kinase                          |
| CTNNB1 | catenin beta 1                                                         |
| DDR2   | discoidin domain receptor tyrosine kinase 2                            |
| EGFR   | epidermal growth factor receptor                                       |
| ERBB2  | erb-b2 receptor tyrosine kinase 2                                      |
| ERBB4  | erb-b2 receptor tyrosine kinase 4                                      |
| FBX7   | F-box protein 7                                                        |
| FGFR3  | fibroblast growth factor receptor 3                                    |
| FGFR1  | fibroblast growth factor receptor 1                                    |
| FGFR2  | fibroblast growth factor receptor 2                                    |
| KRAS   | KRAS proto-oncogene, GTPase                                            |
| MAP2K1 | mitogen-activated protein kinase 1                                     |
| MET    | MET proto-oncogene, receptor tyrosine kinase                           |
| NOTCH1 | notch receptor 1                                                       |
| NRAS   | NRAS proto-oncogene, GTPase                                            |
| PTEN   | phosphatase and tensin homolog                                         |
| PIK3CA | phosphatidylinositol-4,5-bisphosphate 3-kinase catalytic subunit alpha |
| STK11  | serine/threonine kinase 11                                             |
| SMAD4  | SMAD family member 4                                                   |
| TP53   | tumor protein p53                                                      |
